# Supplementary material for: Lactobacillus plantarum reverse diabetes-induced Fmo3 and ICAM expression in mice through enteric dysbiosis-related c-Jun NH2-terminal kinase pathways
Source: PubMed Central journal article supplement (PMC5978885; doi:10.1371/journal.pone.0196511), 2018-05-31
Supplement: pone.0196511.s001.pdf [file pone.0196511.s001.pdf]

1 **Supporting information**

2 **S1 Table**

3 **Blood glucose levels and body weight in Control, STZ-DM, STZ-DM+FOS, STZ-DM+dL.P.**  
4 **mice**

5

| <b>Blood Glucose (mg/dl)</b> |                   |                   |                     |
|------------------------------|-------------------|-------------------|---------------------|
| <b>Control</b>               | <b>STZ-DM</b>     | <b>STZ-DM+FOS</b> | <b>STZ-DM+dL.P.</b> |
| <b>120±13</b>                | <b>570±105***</b> | <b>567±102***</b> | <b>572±102***</b>   |

6

7

| <b>Body Weight (g)</b> |                  |                   |                     |
|------------------------|------------------|-------------------|---------------------|
| <b>Control</b>         | <b>STZ-DM</b>    | <b>STZ-DM+FOS</b> | <b>STZ-DM+dL.P.</b> |
| <b>28.5±3</b>          | <b>18.5±3***</b> | <b>18.3±3***</b>  | <b>17.9±3***</b>    |

8 STZ, streptozotocin; DM, diabetes mellitus; FOS, fructooligosaccharides; dL.P., dead *L.*

9 *plantarum*. \*\*\* $P < 0.001$  vs Control. n = 40/group.

10
